# Supplementary material
Source: MDPI journal article supplement (https://www.mdpi.com/2079-9292/13/3/646)
Supplement: s1 [file s1]

## Supplementary Materials

Table S1 shows the detailed settings of the orthogonal table.

**Table S1** Orthogonal experimental table of mask factors.

| <i>Experiment number</i> | <i>Mask number</i> | <i>Mask structure</i> | <i>Replacement strategy</i> | <i>Accuracy(MD, dB)</i> | <i>Sensitivity(partial AUC)</i> |
|--------------------------|--------------------|-----------------------|-----------------------------|-------------------------|---------------------------------|
| 1                        | 4                  | Random                | Fixed value                 | 2.075098817             | 0.504228                        |
| 2                        | 4                  | Random                | Half mask                   | 1.993383207             | 0.498838                        |
| 3                        | 4                  | Random                | Neighbor mask               | 1.995814036             | 0.49618                         |
| 4                        | 4                  | Connected             | Fixed value                 | 2.010507236             | 0.488942                        |
| 5                        | 4                  | Connected             | Half mask                   | 2.010507236             | 0.497055                        |
| 6                        | 4                  | Connected             | Neighbor mask               | 2.000480367             | 0.495482                        |
| 7                        | 4                  | Block                 | Fixed value                 | 2.104280548             | 0.497073                        |
| 8                        | 4                  | Block                 | Half mask                   | 1.997086598             | 0.501329                        |
| 9                        | 4                  | Block                 | Neighbor mask               | 1.983592225             | 0.499012                        |
| 10                       | 9                  | Random                | Fixed value                 | 2.479214894             | 0.499078                        |
| 11                       | 9                  | Random                | Half mask                   | 2.109649673             | 0.494021                        |
| 12                       | 9                  | Random                | Neighbor mask               | 2.075026439             | 0.504954                        |
| 13                       | 9                  | Connected             | Fixed value                 | 2.674664109             | 0.465776                        |
| 14                       | 9                  | Connected             | Half mask                   | 2.106434941             | 0.497765                        |
| 15                       | 9                  | Connected             | Neighbor mask               | 2.067419268             | 0.500785                        |
| 16                       | 9                  | Block                 | Fixed value                 | 2.598321190             | 0.475284                        |
| 17                       | 9                  | Block                 | Half mask                   | 2.094487274             | 0.498398                        |
| 18                       | 9                  | Block                 | Neighbor mask               | 2.064814208             | 0.502105                        |
| 19                       | 16                 | Random                | Fixed value                 | 3.537329534             | 0.47646                         |
| 20                       | 16                 | Random                | Half mask                   | 2.233916905             | 0.488795                        |
| 21                       | 16                 | Random                | Neighbor mask               | 2.189312513             | 0.511665                        |
| 22                       | 16                 | Connected             | Fixed value                 | 3.562342343             | 0.440954                        |
| 23                       | 16                 | Connected             | Half mask                   | 2.232404759             | 0.492332                        |
| 24                       | 16                 | Connected             | Neighbor mask               | 2.174904299             | 0.509843                        |
| 25                       | 16                 | Block                 | Fixed value                 | 3.256954256             | 0.455409                        |
| 26                       | 16                 | Block                 | Half mask                   | 2.223953323             | 0.485438                        |
| 27                       | 16                 | Block                 | Neighbor mask               | 2.202194577             | 0.496807                        |
